# Supplementary material for: Unified analysis method for total and inorganic As determination in foodstuffs by hydride generation high-resolution continuum source quartz tube atomic absorption spectrometry
Source: Royal Society of Chemistry journal article supplement (doi:10.1039/d3ay00142c), 2023-01-01
Supplement: d3ay00142c1.pdf [file d3ay00142c1.pdf]

## ELECTRONIC SUPPLEMENTARY INFORMATION

### Unified analysis method for total and inorganic As determination in foodstuffs by hydride generation high-resolution continuum source quartz tube atomic absorption spectrometry

Lucia Chirita<sup>a,b</sup>, Eniko Covaci<sup>a,b</sup>, Michaela Ponta<sup>a,b</sup>, Tiberiu Frentiu<sup>a,b\*</sup>

<sup>a</sup> Babes-Bolyai University, Faculty of Chemistry and Chemical Engineering, Arany Janos 11, 400028 Cluj-Napoca, Romania. E-mail: tiberiu.frentiu@ubbcluj.ro

<sup>b</sup> Babes-Bolyai University, Research Center for Advanced Analysis, Instrumentation and Chemometrics, Arany Janos 11, 400028 Cluj-Napoca, Romania

This online resource contains the following data:

1. Operation of the HG-HR-CS-QTAAS analytical system
2. Sample preparation procedure for the determination of tAs and iAs by HG-HR-CS-QTAAS
3. Influence of experimental conditions on arsine generation from As(III) and absorption signal
4. Inter-day reproducibility for the calibration curve and LOD in peak height absorbance measurement
5. Comparison of LODs of As obtained by HG-HR-CS-QTAAS and other methods
6. Mineral matrix composition of samples analyzed for tAs and iAs determination by HG-HR-CS-QTAAS
7. Comparison of measurement results with the certified or reference values obtained by the Dunnett's method
8. Weight of iAs fractions in foodstuffs

#### 1. Operation of the HG-HR-CS-QTAAS analytical system

The batch mode hydride generation system HS55 consisted of a PTFE reaction cell ensuring gas-liquid separation, a variable speed peristaltic pump with single channel to supply the derivatization reagent (NaBH<sub>4</sub> solution) and an electric oven equipped with a conventional quartz tube atomizer (140 mm length, 15 mm i.d.) with removable quartz windows at the ends, heated at 950 ± 10 °C for arsine atomization. A three-way valve served to control the Ar stream through the system. The reaction cell and the quartz tube were connected by a 120 cm length Nafion dryer tube to remove the moisture from the wet carrier Ar-arsine stream. The high-resolution spectrometer ContrAA 300 is equipped with a high-intensity xenon short-arc lamp with continuum emission (185–900 nm), a high-resolution double monochromator (2 pm FWHM) and a charge-coupled device (CCD) detector with 512 pixels. A number of 200 pixels were used to view the As 193.696 nm line and spectral environment of ± 0.1 nm. The signal of the As 193.696 nm line was integrated over 5 pixels (CP ± 2). The operation procedure,

although discontinuous, was simple and involved pipetting of 5 mL sample aliquots into the reaction cell, air purging from the cell reaction-quartz tube assembly with an Ar stream, then pumping a volume of 3.5 mL NaBH<sub>4</sub> solution. The arsine generated in the reaction cell together with H<sub>2</sub> and O<sub>2</sub> traces was purged from the liquid with 6 L h<sup>-1</sup> Ar and directed through the Nafion tube to the QTA. The free As atoms generated in the quartz tube absorbed the specific wavelength of 193.696 nm emitted by the Xe continuum radiation source passing through the QTA. The transmitted radiation falls on the CCD detector and the absorption spectrum was recorded over the range  $\pm 0.1$  nm in the vicinity of the analytical line As 193.696 nm. Background correction was achieved by subtracting the signal of the appropriate blank solution (e.g. 0.2% L – cysteine in HCl (pH = 2.00  $\pm$  0.01)) from the integrated absorption of As over the 5 pixel bandwidth in the centre of the spectral window. Spectra were recorded with an integration time of 40 s and the As signal was measured as both peak height and area.

## 2. Sample preparation procedure for the determination of tAs and iAs by HG-HR-CS-QTAAS

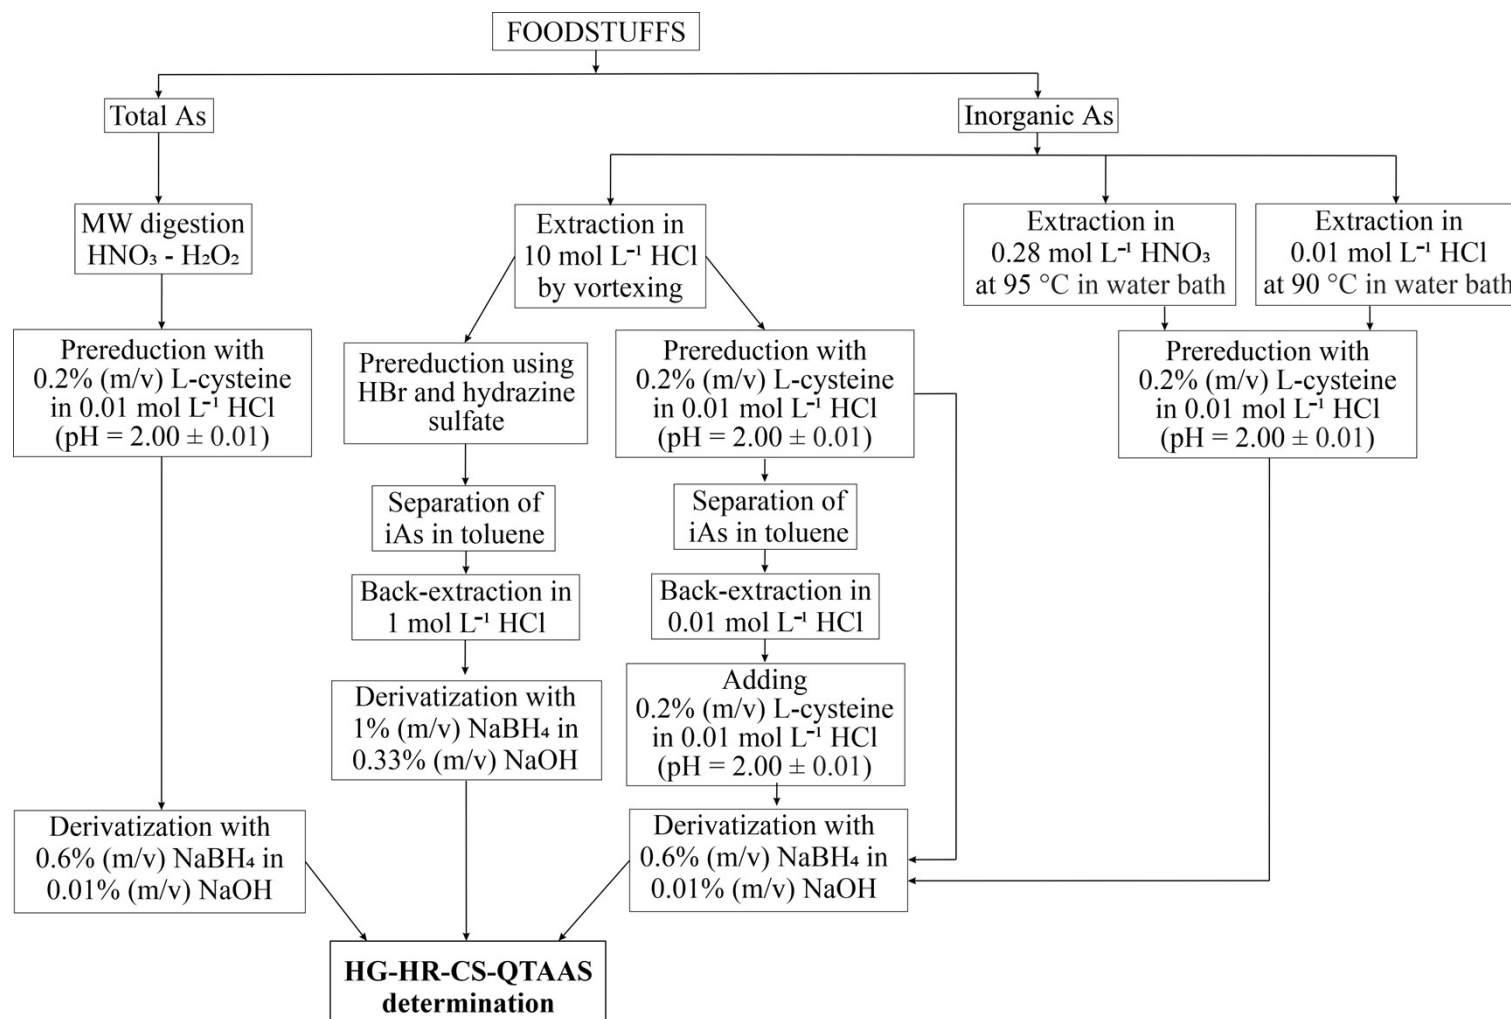

**Fig. S1.** Schematic representation of sample preparation procedures for foodstuffs for the determination of tAs and iAs by the HG-HR-CS-QTAAS method

### 3. Influence of the experimental conditions for arsine generation from As(III) on the absorption signal

The effects of the concentrations of NaOH, sample pH, NaBH<sub>4</sub>, L-cysteine, antifoam agent and volume of NaBH<sub>4</sub> solution on the As absorption signal for 5 mL aliquots containing 2 μg L<sup>-1</sup> As(III) are presented in Figs. S2–S7.

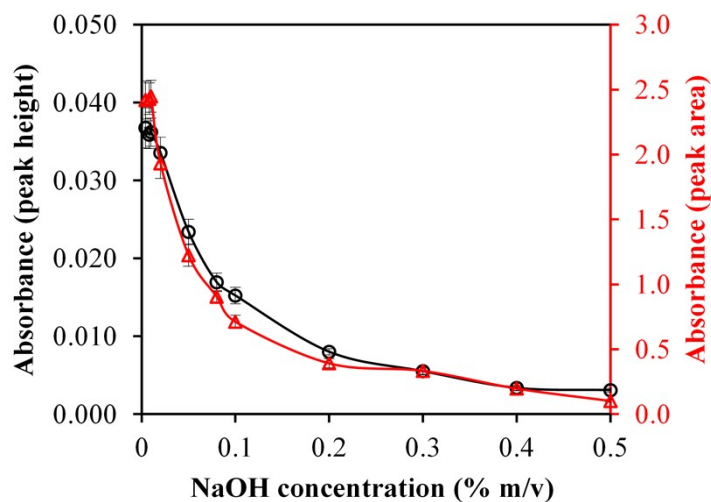

**Fig. S2.** Effect of NaOH concentration on the As absorption signal. Sample: 5 mL solution containing 2 μg L<sup>-1</sup>As(III) in 0.2% (m/v) L-cysteine and HCl (pH = 2.00 ± 0.01); 3.5 mL 0.6% (m/v) NaBH<sub>4</sub> solution. Error bars correspond to SD for five successive measurements.

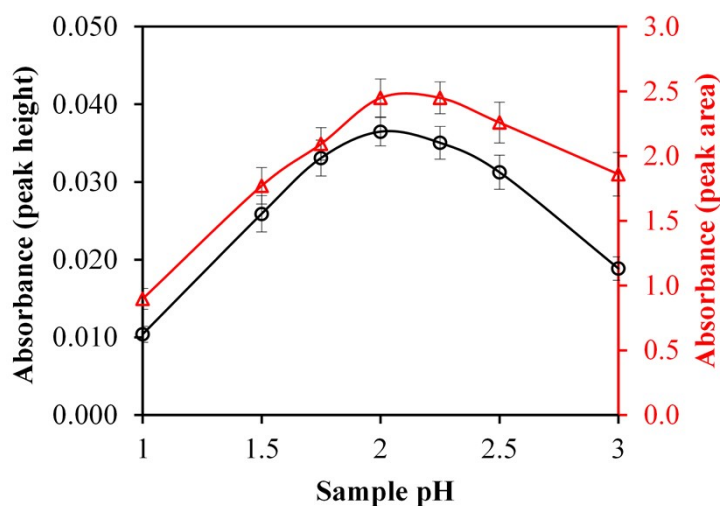

**Fig. S3.** Effect of sample pH on the As absorption signal. Sample: 5 mL solution containing 2 μg L<sup>-1</sup>As(III) in HCl (pH = 2.00 ± 0.01); 3.5 mL 0.6% NaBH<sub>4</sub> solution stabilized in 0.01% NaOH. Error bars correspond to SD for five successive measurements.

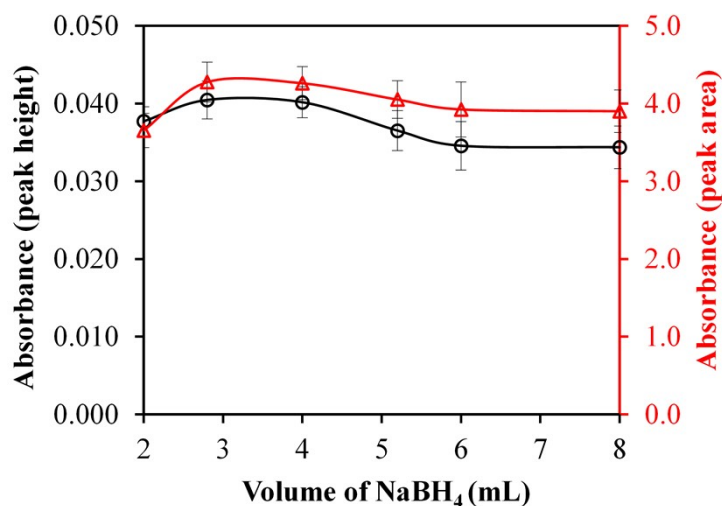

**Fig. S4.** Effect of the volume of 0.6% NaBH<sub>4</sub> solution stabilized in 0.01% NaOH on the As absorption signal. Sample: 5 mL solution containing 2 μg L<sup>-1</sup> As(III) in HCl (pH = 2.00 ± 0.01). Error bars correspond to SD for five successive measurements.

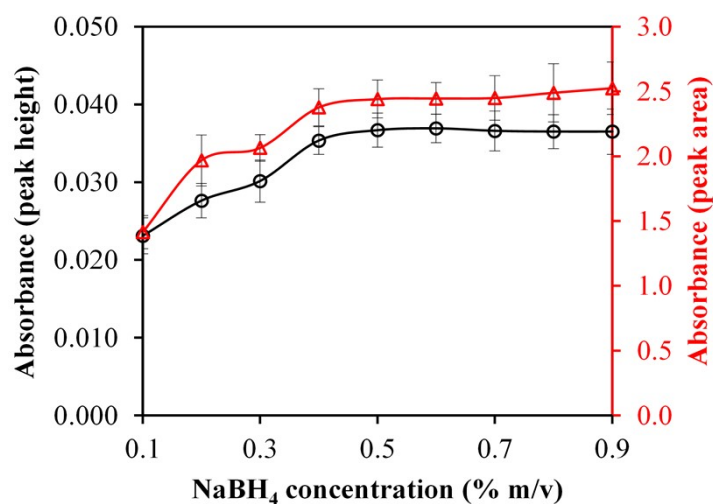

**Fig. S5.** Effect of NaBH<sub>4</sub> concentration stabilized in 0.01% (m/v) NaOH on the As absorption signal. Sample: 5 mL solution containing 2 μg L<sup>-1</sup> As(III) in 0.2% (m/v) L-cysteine and HCl (pH = 2.00 ± 0.01); 3.5 mL 0.6% NaBH<sub>4</sub> solution stabilized in 0.01% NaOH. Error bars correspond to SD for five successive measurements.

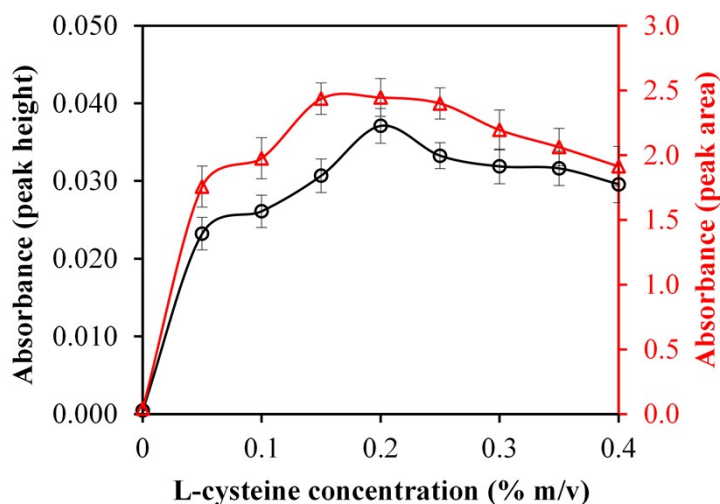

**Fig. S6.** Effect of L-cysteine concentration on the As absorption signal. Sample: 5 mL solution containing  $2 \mu\text{g L}^{-1}$  As(III) in HCl ( $\text{pH} = 2.00 \pm 0.01$ ); 3.5 mL 0.6%  $\text{NaBH}_4$  solution stabilized in 0.01% NaOH. Error bars correspond to SD for five successive measurements.

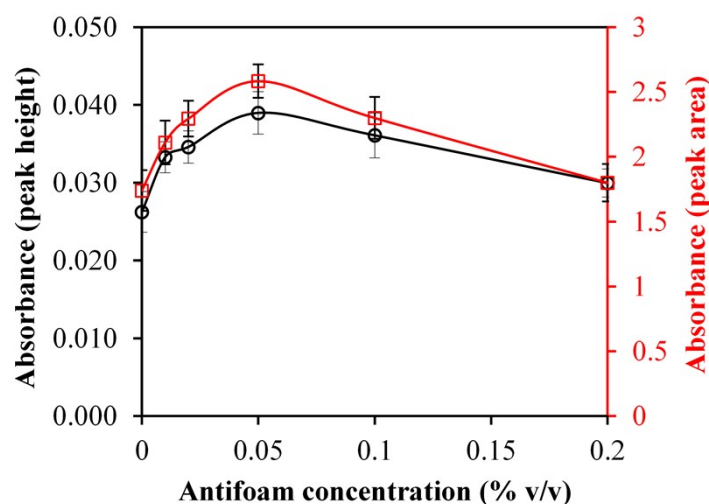

**Fig. S7.** Effect of antifoam agent concentration in 0.6% (m/v)  $\text{NaBH}_4$  stabilized in 0.01% (m/v) NaOH on the As absorption signal. Sample: 5 mL solution containing  $2 \mu\text{g L}^{-1}$  As(III) in 0.2% L-cysteine and HCl ( $\text{pH} = 2.00 \pm 0.01$ ); 3.5 mL 0.6%  $\text{NaBH}_4$  solution stabilized in 0.01% NaOH. Error bars correspond to SD for five successive measurements.

The increase of NaOH concentration above 0.01% (m/v) in the  $\text{NaBH}_4$  solution (Fig. S2) induced an exponential decrease of As absorption. The optimal pH in sample solution was  $2.00 \pm 0.01$  (Fig. S3). The absorption signal decreased when pH was  $> 2$ , as a result of the decrease in the concentration of hydronium ions involved in the kinetics of arsine generation, and lower amount of hydrogen generating free radicals necessary for arsine atomization in QT. Similarly, a decrease of the As absorption was observed when using volumes of  $\text{NaBH}_4$  solution higher than 3.5 mL for 5 mL sample ( $\text{pH} = 2.00 \pm 0.01$ ), as a result of HCl neutralization by NaOH, and thereby a decreased rate of

arsine generation (Fig. S4). The concentration of NaBH<sub>4</sub> should be in the range 0.5–0.9% (m/v), so we decided for 0.6% (Fig. S5). L-cysteine used as prereductant was also involved in arsine generation from As(III), since the absorption response increased with concentration up to 0.15% (m/v). The level of 0.2% (m/v) L-cysteine in the sample solution was selected as optimal in the study (Fig. S6). The optimal concentration of antifoam agent in the NaBH<sub>4</sub> solution was established as 0.05% (v/v), above which a linear decrease of the absorption signal was observed (Fig. S7). The antifoam agent was necessary in all sample preparation procedures for iAs determination, when the separation by liquid-liquid extraction in the toluene-HCl system was not applied, to prevent foaming caused by the reaction between proteins and NaBH<sub>4</sub>.

#### 4. Inter-day reproducibility for the calibration curve and LOD in peak height absorbance measurement

**Table S1.** Inter-day reproducibility of the calibration curve and LOD for 25 days for As determination in 5 mL aliquot by HG-HR-CS-QTAAS in peak height measurement after prereduction with 0.2% L-cysteine in HCl (pH = 2.00 ± 0.01) and derivatization with 3.5 mL 0.6% (m/v) NaBH<sub>4</sub> in 0.01% (m/v) NaOH and 0.05% (v/v) antifoam agent

| Characteristics of the calibration plot |                              |                              | Standard deviation of signal for blank solution (a.u.) | LOD (µg L <sup>-1</sup> )  |
|-----------------------------------------|------------------------------|------------------------------|--------------------------------------------------------|----------------------------|
| Intercept (a.u.)                        | Slope (L µg <sup>-1</sup> )  | R <sup>2</sup>               |                                                        |                            |
| 0.0011                                  | 0.0228                       | 0.9996                       | 0.0004                                                 | 0.053                      |
| 0.0007                                  | 0.0164                       | 0.9978                       | 0.0004                                                 | 0.073                      |
| 0.0002                                  | 0.0184                       | 0.9995                       | 0.0004                                                 | 0.065                      |
| 0.0044                                  | 0.0186                       | 0.9979                       | 0.0004                                                 | 0.065                      |
| 0.0010                                  | 0.0185                       | 0.9995                       | 0.0003                                                 | 0.049                      |
| 0.0016                                  | 0.0173                       | 0.9988                       | 0.0004                                                 | 0.069                      |
| 0.0012                                  | 0.0188                       | 0.9992                       | 0.0005                                                 | 0.080                      |
| 0.0004                                  | 0.0187                       | 0.9981                       | 0.0005                                                 | 0.080                      |
| 0.0012                                  | 0.0193                       | 0.9997                       | 0.0005                                                 | 0.078                      |
| 0.0003                                  | 0.0162                       | 0.9952                       | 0.0005                                                 | 0.093                      |
| 0.0021                                  | 0.0174                       | 0.9976                       | 0.0005                                                 | 0.086                      |
| 0.0011                                  | 0.0185                       | 0.9989                       | 0.0004                                                 | 0.065                      |
| 0.0026                                  | 0.0190                       | 0.9994                       | 0.0005                                                 | 0.079                      |
| 0.0007                                  | 0.0162                       | 0.9996                       | 0.0004                                                 | 0.074                      |
| 0.0071                                  | 0.0186                       | 0.9967                       | 0.0004                                                 | 0.065                      |
| 0.0012                                  | 0.0170                       | 0.9987                       | 0.0004                                                 | 0.071                      |
| 0.0026                                  | 0.0201                       | 0.9995                       | 0.0003                                                 | 0.045                      |
| 0.0012                                  | 0.0181                       | 0.9981                       | 0.0003                                                 | 0.050                      |
| 0.0011                                  | 0.0171                       | 0.9997                       | 0.0004                                                 | 0.070                      |
| 0.0002                                  | 0.0203                       | 0.9991                       | 0.0005                                                 | 0.070                      |
| 0.0004                                  | 0.0189                       | 0.9996                       | 0.0005                                                 | 0.079                      |
| 0.0038                                  | 0.0174                       | 0.9996                       | 0.0004                                                 | 0.069                      |
| 0.0008                                  | 0.0180                       | 0.9988                       | 0.0004                                                 | 0.067                      |
| 0.0055                                  | 0.0187                       | 0.9984                       | 0.0005                                                 | 0.080                      |
| 0.0013                                  | 0.0180                       | 0.9958                       | 0.0003                                                 | 0.050                      |
| 0.0018 ± 0.0007 <sup>a</sup>            | 0.0183 ± 0.0006 <sup>a</sup> | 0.9986 ± 0.0005 <sup>a</sup> | 0.0004 ± 0.0001 <sup>a</sup>                           | 0.070 ± 0.005 <sup>a</sup> |

<sup>a</sup> Mean ± CI (confidence interval for 95% confidence level, n = 25 days)

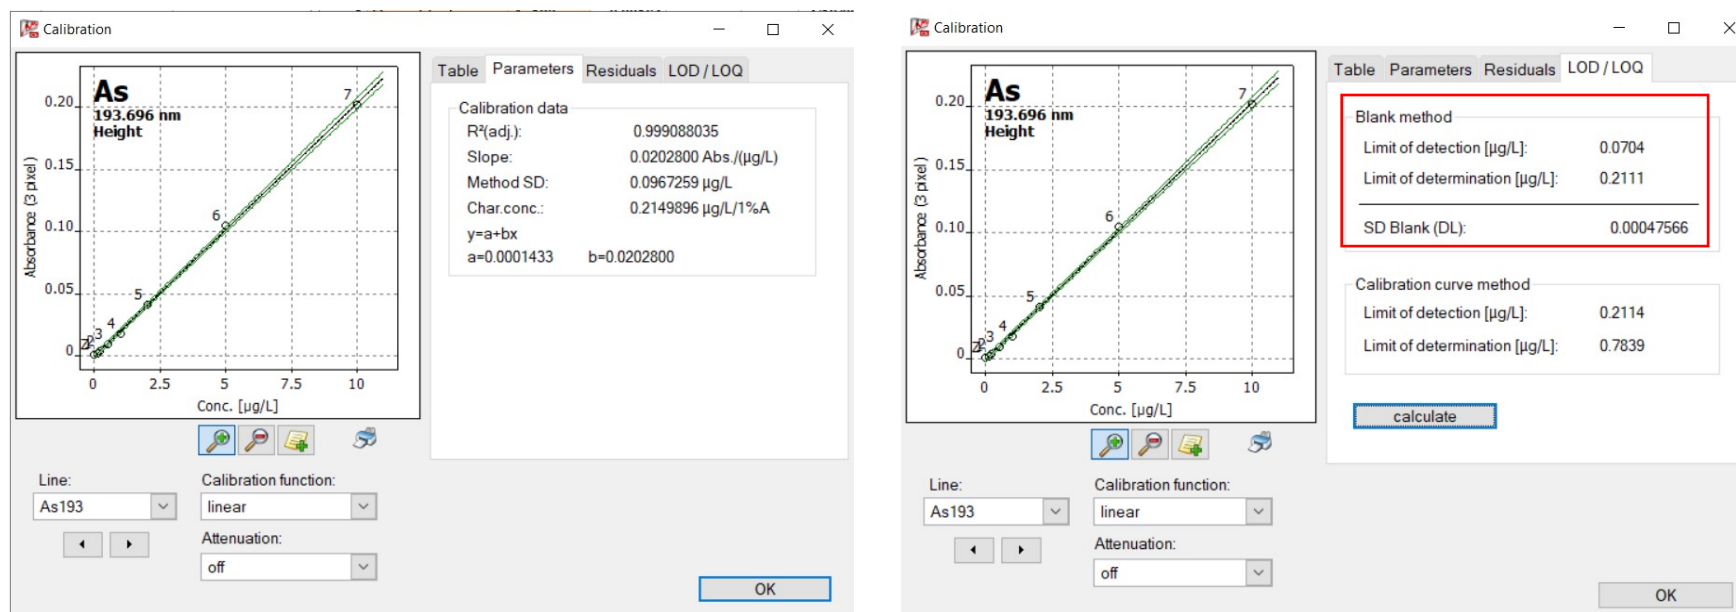

**Fig. S8.** Calibration curve and corresponding LOD ( $3\sigma$  criterion) for As 193.696 nm and peak height measurement

**Table S2.** Absorbance signals ( $n = 11$ ) of the blank solution of 0.2% (m/v) L-cysteine in  $0.01 \text{ mol L}^{-1}$  HCl ( $\text{pH} = 2.00 \pm 0.01$ )

| Signal blank (a.u.)                                                                              | Standard deviation ( $s_b$ ) (a.u.) |
|--------------------------------------------------------------------------------------------------|-------------------------------------|
| 0.00010 0.00068 0.00187 0.00118 0.00070 0.00052 0.00043 0.00067 0.00094 0.00038 0.00101 0.000476 |                                     |



## 5. Comparison of LODs of As obtained by HG-HR-CS-QFAAS and other methods

**Table S3.** Limit of detection of As obtained by HG-HR-CS-QTAAS using derivatization to arsine in 0.01 mol L<sup>-1</sup> HCl (pH = 2.00 ± 0.01) in the presence of 0.2% (m/v) L-cysteine in comparison with other methods

| Method <sup>a</sup> | As species     | Samples          | Preparation procedure                                                                                                                                                                                                                                 | LOD                                 | Reference <sup>b</sup> |
|---------------------|----------------|------------------|-------------------------------------------------------------------------------------------------------------------------------------------------------------------------------------------------------------------------------------------------------|-------------------------------------|------------------------|
| HG-HR-CS-QTAAS      | tAs            | Food samples     | Microwave-assisted digestion in HNO <sub>3</sub> – H <sub>2</sub> O <sub>2</sub> and batch mode derivatization to arsine without preconcentration                                                                                                     | 0.0044 ± 0.0005 mg kg <sup>-1</sup> | This paper             |
| HG-HR-CS-QTAAS      | iAs            | Food samples     | Extraction in different reagents (10 mol L <sup>-1</sup> HCl; 0.01 mol L <sup>-1</sup> HCl and 0.28 mol L <sup>-1</sup> HNO <sub>3</sub> ) with and without separation of iAs species using double liquid-liquid extraction in the toluene-HCl system | 0.0022 ± 0.0003 mg kg <sup>-1</sup> | This paper             |
| HG-HR-CS-QTAAS      | tAs/iAs        | Natural water    | Batch mode derivatization without preconcentration                                                                                                                                                                                                    | 0.070 ± 0.006 µg L <sup>-1</sup>    | This paper             |
| GFAAS               | tAs            | Mushrooms        | Oxalic acid deep eutectic solvent extraction                                                                                                                                                                                                          | 0.50 µg L <sup>-1</sup>             | 18                     |
| GFAAS               | iAs            | Water            | Ultrasound-assisted supramolecular solvent microextraction and direct liquid sampling                                                                                                                                                                 | 0.2 µg L <sup>-1</sup>              | 20                     |
| HR-CS-GFAAS         | iAs            | Fish and seafood | Direct solid sampling                                                                                                                                                                                                                                 | 0.05 µg kg <sup>-1</sup>            | 21                     |
| ICP-MS/MS           | tAs            | Food             | Microwave-assisted digestion in HNO <sub>3</sub> – H <sub>2</sub> O <sub>2</sub> and derivatization without preconcentration                                                                                                                          | 0.5 µg L <sup>-1</sup>              | 15                     |
| ICP-MS              | As(III), As(V) | Water            | Solid phase microextraction                                                                                                                                                                                                                           | 2.7; 3.2 ng L <sup>-1</sup>         | 31                     |

|                |                |                                            |                                                                                                                                                                                                                                                                                                                 |                                             |    |
|----------------|----------------|--------------------------------------------|-----------------------------------------------------------------------------------------------------------------------------------------------------------------------------------------------------------------------------------------------------------------------------------------------------------------|---------------------------------------------|----|
| HG-AAS         | As(III), As(V) | Natural water and Human biological samples | Ultrasound solid phase microextraction and derivatization                                                                                                                                                                                                                                                       | 0.0248 $\mu\text{g L}^{-1}$                 | 27 |
| HG-AAS         | iAs            | Rice                                       | Deep eutectic solvent ultrasound-assisted extraction and derivatization                                                                                                                                                                                                                                         | 1.7 $\mu\text{g L}^{-1}$                    | 28 |
| HG-AAS         | tAs            | Human urine                                | Alkaline digestion using $\text{Na}_2\text{S}_2\text{O}_8$ - NaOH solution                                                                                                                                                                                                                                      | 0.09 $\mu\text{g L}^{-1}$                   | 49 |
| HG-HR-CS-GFAAS | tAs            | Surface water (lake and sea)               | Solid phase microextraction and chemical vapor generation                                                                                                                                                                                                                                                       | 0.25 $\mu\text{g L}^{-1}$                   | 50 |
| HG-CT-AAS      | iAs, MMA, DMA  | Baby food                                  | Extraction in 3 mol $\text{L}^{-1}$ HCl, derivatization and cryotrapping                                                                                                                                                                                                                                        | 0.44; 0.24; 0.16 $\mu\text{g kg}^{-1}$      | 26 |
| HG-AFS         | iAs            | Rice and vegetables                        | Electrochemical HG approach                                                                                                                                                                                                                                                                                     | 0.3 $\mu\text{g L}^{-1}$                    | 29 |
| HG-AFS         | tAs, iAs       | Rice                                       | tAs extraction in 1:9 alkaline persulfate oxidation (3% m/v $\text{K}_2\text{S}_2\text{O}_8$ and 4% m/v NaOH)<br>iAs extraction in 3 mL conc. $\text{HNO}_3$ + 1 mL $\text{H}_2\text{O}_2$ (2 h, 100°C)<br>Prereduction with 1% KI and 0.2% ascorbic acid and hydride generation in 4.8 mol $\text{L}^{-1}$ HCl | 3 ng $\text{g}^{-1}$ ; 1 ng $\text{g}^{-1}$ | 30 |
| HG-ICP-OES     | tAs/iAs        | Rice                                       | Ultrasound-assisted extraction in <i>aqua regia</i> without preconcentration                                                                                                                                                                                                                                    | 5.6 ng $\text{g}^{-1}$                      | 31 |

<sup>a</sup> GFAAS – graphite furnace atomic absorption spectrometry; HR-CS-GFAAS – high-resolution continuum source graphite furnace atomic absorption spectrometry; HG-AAS – hydride generation atomic absorption spectrometry; HG-HR-CS-GFAAS – hydride generation high-resolution continuum source graphite furnace atomic absorption spectrometry; HG-AFS – hydride generation atomic fluorescence spectrometry; HG-CT-AAS – hydride generation cryotrapping atomic absorption spectrometry; ICP-MS – inductively coupled plasma mass spectrometry

<sup>b</sup> References in this table are those indicated in the paper

## 6. Mineral matrix composition of samples analyzed for tAs and iAs determination by HG-HR-CS-QTAAS

**Table S4.** Composition of the mineral matrix (mg L<sup>-1</sup>) in the samples analyzed for tAs determination by the HG-HR-CS-QTAAS method

| Meat (fish muscle, pork and chicken) and organs |       |      |       |       |        |        |       |       |       |       |      |      |        |         |        |       |
|-------------------------------------------------|-------|------|-------|-------|--------|--------|-------|-------|-------|-------|------|------|--------|---------|--------|-------|
|                                                 | Na    | K    | Mg    | Ca    | Al     | Fe     | Cr    | Mn    | Co    | Ni    | Cu   | Zn   | Sr     | Ba      | Cd     | Pb    |
| Min                                             | 0.001 | 0.2  | 0.01  | 0.002 | <0.003 | 0.03   | <0.01 | 0.004 | <0.02 | <0.02 | 0.01 | 0.02 | <0.007 | <0.0004 | 0.001  | <0.01 |
| Max                                             | 10.0  | 36.9 | 3.4   | 21.1  | <0.003 | 0.5    | 0.03  | 0.02  | <0.02 | <0.02 | 0.4  | 1.1  | <0.007 | <0.0004 | 0.003  | <0.01 |
| Mean                                            | 4.5   | 11.8 | 1.1   | 5.1   | <0.003 | 0.2    | 0.01  | 0.01  | <0.02 | <0.02 | 0.2  | 0.2  | <0.007 | <0.0004 | 0.002  | <0.01 |
| SD                                              | 3.6   | 10.5 | 1.2   | 7.2   | <0.003 | 0.2    | 0.004 | 0.01  | <0.02 | <0.02 | 0.2  | 0.3  | <0.007 | <0.0004 | 0.001  | <0.01 |
| Rice, rice-based preparations for babies        |       |      |       |       |        |        |       |       |       |       |      |      |        |         |        |       |
| Min                                             | 0.03  | 0.3  | 0.001 | 0.01  | <0.003 | <0.006 | <0.01 | 0.001 | <0.02 | <0.02 | 0.3  | 0.01 | <0.007 | <0.0004 | <0.001 | <0.01 |
| Max                                             | 0.6   | 2.2  | 1.6   | 0.03  | <0.003 | <0.006 | <0.01 | 0.05  | <0.02 | <0.02 | 0.7  | 0.2  | <0.007 | <0.0004 | <0.001 | <0.01 |
| Mean                                            | 0.2   | 0.8  | 0.5   | 0.02  | <0.003 | <0.006 | <0.01 | 0.02  | <0.02 | <0.02 | 0.5  | 0.1  | <0.007 | <0.0004 | <0.001 | <0.01 |
| SD                                              | 0.1   | 0.6  | 0.4   | 0.01  | <0.003 | <0.006 | <0.01 | 0.02  | <0.02 | <0.02 | 0.2  | 0.1  | <0.007 | <0.0004 | <0.001 | <0.01 |

**Table S5.** Composition of the mineral matrix (mg L<sup>-1</sup>) in foodstuffs (meat, rice and rice-based products) analyzed for iAs determination by the HG-HR-CS-QTAAS method using extraction in 10 mol L<sup>-1</sup> HCl

|                                   | Na   | K    | Mg   | Ca   | Al   | Fe   | Cr    | Mn     | Co    | Ni    | Cu   | Zn   | Sr     | Ba      | Cd     | Pb    |
|-----------------------------------|------|------|------|------|------|------|-------|--------|-------|-------|------|------|--------|---------|--------|-------|
| <i>Without separation</i>         |      |      |      |      |      |      |       |        |       |       |      |      |        |         |        |       |
| Min                               | 50   | 0.5  | 0.3  | 0.04 | 0.02 | 0.05 | <0.01 | <0.002 | <0.02 | <0.02 | 0.07 | 0.03 | <0.007 | 0.002   | <0.001 | <0.01 |
| Max                               | 820  | 5.5  | 15   | 9.0  | 0.40 | 4.8  | <0.01 | <0.002 | <0.02 | <0.02 | 0.80 | 1.2  | 0.03   | 0.09    | <0.001 | <0.01 |
| Mean                              | 350  | 2.0  | 2.2  | 2.4  | 0.30 | 1.3  | <0.01 | <0.002 | <0.02 | <0.02 | 0.30 | 0.40 | 0.02   | 0.01    | <0.001 | <0.01 |
| SD                                | 230  | 1.6  | 3.2  | 1.7  | 0.12 | 1.0  | <0.01 | <0.002 | <0.02 | <0.02 | 0.20 | 0.30 | 0.21   | 0.04    | <0.001 | <0.01 |
| <i>With separation in toluene</i> |      |      |      |      |      |      |       |        |       |       |      |      |        |         |        |       |
| Min                               | 0.10 | 0.01 | 0.02 | 0.04 | 0.01 | 0.05 | <0.01 | <0.002 | <0.02 | <0.02 | 0.07 | 0.03 | <0.007 | <0.0004 | <0.001 | <0.01 |
| Max                               | 20.0 | 3.7  | 0.60 | 0.80 | 0.17 | 2.2  | <0.01 | <0.002 | <0.02 | <0.02 | 0.24 | 0.18 | <0.007 | <0.0004 | <0.001 | <0.01 |
| Mean                              | 2.4  | 0.70 | 0.30 | 0.40 | 0.07 | 1.2  | <0.01 | <0.002 | <0.02 | <0.02 | 0.15 | 0.11 | <0.007 | <0.0004 | <0.001 | <0.01 |
| SD                                | 5.8  | 1.0  | 0.20 | 0.30 | 0.05 | 0.50 | <0.01 | <0.002 | <0.02 | <0.02 | 0.06 | 0.04 | <0.007 | <0.0004 | <0.001 | <0.01 |

**Table S6.** Composition of the mineral matrix (mg L<sup>-1</sup>) in foodstuffs (meat, rice and rice-based products) analyzed for iAs determination by the HG-HR-CS-QTAAS method using extraction in 0.28 mol L<sup>-1</sup> HNO<sub>3</sub> and 0.01 mol L<sup>-1</sup> HCl without separation

|                                                                                 | Na   | K    | Mg   | Ca   | Al   | Fe   | Cr    | Mn     | Co    | Ni    | Cu   | Zn   | Sr     | Ba      | Cd     | Pb    |
|---------------------------------------------------------------------------------|------|------|------|------|------|------|-------|--------|-------|-------|------|------|--------|---------|--------|-------|
| <i>Extraction in 0.28 mol L<sup>-1</sup> HNO<sub>3</sub> without separation</i> |      |      |      |      |      |      |       |        |       |       |      |      |        |         |        |       |
| Min                                                                             | 3.4  | 0.20 | 0.30 | 0.04 | 0.02 | 0.04 | <0.01 | <0.002 | <0.02 | <0.02 | 0.05 | 0.02 | <0.007 | <0.0004 | <0.001 | <0.01 |
| Max                                                                             | 160  | 5.5  | 2.1  | 2.5  | 0.30 | 0.80 | <0.01 | <0.002 | <0.02 | <0.02 | 0.21 | 0.90 | <0.007 | <0.0004 | <0.001 | <0.01 |
| Mean                                                                            | 51   | 2.3  | 1.0  | 0.70 | 0.15 | 0.30 | <0.01 | <0.002 | <0.02 | <0.02 | 0.13 | 0.20 | <0.007 | <0.0004 | <0.001 | <0.01 |
| SD                                                                              | 30   | 1.7  | 0.70 | 0.50 | 0.09 | 0.20 | <0.01 | <0.002 | <0.02 | <0.02 | 0.06 | 0.13 | <0.007 | <0.0004 | <0.001 | <0.01 |
| <i>Extraction in 0.01 mol L<sup>-1</sup> HCl without separation</i>             |      |      |      |      |      |      |       |        |       |       |      |      |        |         |        |       |
| Min                                                                             | 0.70 | 0.03 | 0.07 | 0.06 | 0.08 | 0.08 | <0.01 | <0.002 | <0.02 | <0.02 | 0.02 | 0.02 | <0.007 | <0.0004 | <0.001 | <0.01 |
| Max                                                                             | 10.0 | 4.2  | 2.3  | 0.70 | 0.40 | 0.40 | <0.01 | <0.002 | <0.02 | <0.02 | 0.04 | 0.50 | <0.007 | <0.0004 | <0.001 | <0.01 |
| Mean                                                                            | 3.1  | 1.7  | 0.5  | 0.30 | 0.20 | 0.20 | <0.01 | <0.002 | <0.02 | <0.02 | 0.03 | 0.20 | <0.007 | <0.0004 | <0.001 | <0.01 |
| SD                                                                              | 2.5  | 1.3  | 0.2  | 0.20 | 0.10 | 0.10 | <0.01 | <0.002 | <0.02 | <0.02 | 0.02 | 0.10 | <0.007 | <0.0004 | <0.001 | <0.01 |

## 7. Comparison of measurement results with the certified or reference values obtained by the Dunnett's method

**Table S7.** Significant differences ( $p < 0.05$ ) between the found means and certified/reference means in CRMs using the Dunnett's method

| CRM                           | Certified or reference value $\pm U^a$ (mg kg <sup>-1</sup> ) | Calib. Method    | Significant differences for recovery (mean $\pm U_{lab}$ ) <sup>b</sup> (%) |                                                  |                                 |                                                         |                                            | Pooled results |
|-------------------------------|---------------------------------------------------------------|------------------|-----------------------------------------------------------------------------|--------------------------------------------------|---------------------------------|---------------------------------------------------------|--------------------------------------------|----------------|
|                               |                                                               |                  | Extraction in 10 mol L <sup>-1</sup> HCl                                    |                                                  |                                 | Extraction in 0.28 mol L <sup>-1</sup> HNO <sub>3</sub> | Extraction in 0.01 mol L <sup>-1</sup> HCl |                |
|                               |                                                               |                  | IMEP-41 procedure <sup>c</sup>                                              | Separation by extraction in toluene <sup>d</sup> | Without separation <sup>d</sup> | Without separation <sup>d</sup>                         | Without separation <sup>d</sup>            |                |
| ERM – BC211 Rice              | 0.124 $\pm$ 0.011                                             | Ext.<br>Std. Ad. |                                                                             |                                                  |                                 |                                                         |                                            |                |
| ERM – CE278k Mussel tissue    | 0.086 $\pm$ 0.008 <sup>e</sup>                                | Ext.<br>Std. Ad. |                                                                             |                                                  |                                 |                                                         |                                            |                |
|                               | 0.133 $\pm$ 0.048 <sup>e</sup>                                | Ext.<br>Std. Ad. | 0.00020                                                                     | 0.00010                                          | 0.000606                        | 0.014565                                                | 0.000417                                   | 0.000246       |
| BCR – 627 Tuna fish tissue    | 0.063 $\pm$ 0.027 <sup>e</sup>                                | Ext.<br>Std. Ad. | 0.00016                                                                     | 0.00010                                          | 0.014565                        | 0.003749                                                | 0.003749                                   | 0.000246       |
| SRM 2976 Mussel Tissue        | 0.110 $\pm$ 0.013 <sup>f</sup>                                | Ext.<br>Std. Ad. |                                                                             |                                                  |                                 |                                                         |                                            |                |
| IAEA-359 Cabbage              | 0.091 $\pm$ 0.016 <sup>e</sup>                                | Ext.<br>Std. Ad. |                                                                             |                                                  |                                 |                                                         |                                            |                |
|                               | 0.074 $\pm$ 0.033 <sup>e</sup>                                | Ext.<br>Std. Ad. |                                                                             | 0.009675                                         |                                 |                                                         | 0.001056                                   | 0.002262       |
| Tort-2 Lobster Hepatopancreas | 0.71 $\pm$ 0.04 <sup>f</sup>                                  | Ext.<br>Std. Ad. | 0.021330                                                                    | 0.018234                                         |                                 |                                                         |                                            |                |
|                               | 0.582 $\pm$ 0.081 <sup>g</sup>                                | Ext.<br>Std. Ad. | 0.013476                                                                    | 0.027208                                         |                                 | 0.048806                                                |                                            |                |
|                               | 0.615 $\pm$ 0.086 <sup>g</sup>                                | Ext.<br>Std. Ad. |                                                                             |                                                  |                                 |                                                         |                                            |                |
|                               | 0.544 $\pm$ 0.162 <sup>h</sup>                                | Ext.<br>Std. Ad. |                                                                             |                                                  |                                 |                                                         |                                            |                |

<sup>a</sup>U is the expanded uncertainty (k = 2, 95% confidence level); <sup>b</sup>U<sub>lab</sub> – is the expanded uncertainty in laboratory (k = 2, n = 5 parallel measurements and 95% confidence level); <sup>c</sup>IMEP-41 procedure, prereduction with HBr and hydrazine sulfate, separation of iAs in toluene-1 mol L<sup>-1</sup> HCl system, derivatization to arsine with NaBH<sub>4</sub> in 1 mol L<sup>-1</sup> HCl<sup>25,53</sup>; <sup>d</sup> prereduction with L-cysteine and derivatization to arsine with NaBH<sub>4</sub> in 0.01 mol L<sup>-1</sup> HCl and 0.2% L-cysteine; <sup>e</sup> reference values from<sup>4,25,53</sup>; <sup>f</sup> reference values from<sup>59</sup>; <sup>g</sup> reference values calculated as mean according to the results centralized by Petursdottir *et al.*<sup>3,13,33</sup>; <sup>h</sup> reference values from<sup>52</sup>

**Table S8.** Recovery of iAs in CRMs against certified value (ERM-BC211 Rice) and reference values from literature

| CRM                            | Certified or reference value $\pm U^a$ (mg kg <sup>-1</sup> ) | Calib. method | Recovery (mean $\pm U_{lab}^b$ ) (%)      |                                                  |                                           |                                                         |                                            | Pooled results |
|--------------------------------|---------------------------------------------------------------|---------------|-------------------------------------------|--------------------------------------------------|-------------------------------------------|---------------------------------------------------------|--------------------------------------------|----------------|
|                                |                                                               |               | Extraction in 10 mol L <sup>-1</sup> HCl  |                                                  |                                           | Extraction in 0.28 mol L <sup>-1</sup> HNO <sub>3</sub> | Extraction in 0.01 mol L <sup>-1</sup> HCl |                |
|                                |                                                               |               | IMEP-41 procedure <sup>c</sup>            | Separation by extraction in toluene <sup>d</sup> | Without separation <sup>d</sup>           | Without separation <sup>d</sup>                         | Without separation <sup>d</sup>            |                |
| ERM - BC211 Rice               | 0.124 $\pm$ 0.011                                             | Ext.          | 98 $\pm$ 20                               | 94 $\pm$ 20                                      | 97 $\pm$ 13                               | 94 $\pm$ 19                                             | 101 $\pm$ 30                               | 97 $\pm$ 21    |
|                                |                                                               | Std. Ad.      | 106 $\pm$ 15                              | 92 $\pm$ 22                                      | 101 $\pm$ 21                              | 92 $\pm$ 22                                             | 94 $\pm$ 38                                | 97 $\pm$ 25    |
| ERM - CE278k Mussel tissue     | 0.086 $\pm$ 0.008 <sup>e</sup>                                | Ext.          | 100 $\pm$ 10                              | 94 $\pm$ 31                                      | 112 $\pm$ 17                              | 122 $\pm$ 25                                            | 110 $\pm$ 27                               | 108 $\pm$ 23   |
|                                |                                                               | Std. Ad.      | 99 $\pm$ 15                               | 93 $\pm$ 33                                      | 122 $\pm$ 24                              | 117 $\pm$ 33                                            | 117 $\pm$ 28                               | 110 $\pm$ 27   |
|                                | 0.133 $\pm$ 0.048 <sup>e</sup>                                | Ext.          | <b>65 <math>\pm</math> 10<sup>i</sup></b> | <b>61 <math>\pm</math> 31<sup>j</sup></b>        | <b>72 <math>\pm</math> 17<sup>j</sup></b> | <b>79 <math>\pm</math> 25<sup>j</sup></b>               | <b>71 <math>\pm</math> 27<sup>j</sup></b>  | -              |
|                                |                                                               | Std. Ad.      | <b>64 <math>\pm</math> 15<sup>j</sup></b> | <b>60 <math>\pm</math> 33<sup>j</sup></b>        | <b>79 <math>\pm</math> 24<sup>j</sup></b> | <b>76 <math>\pm</math> 33<sup>j</sup></b>               | <b>86 <math>\pm</math> 28<sup>j</sup></b>  | -              |
| BCR - 627 Tuna fish tissue     | 0.063 $\pm$ 0.027 <sup>e</sup>                                | Ext.          | 86 $\pm$ 26                               | 86 $\pm$ 26                                      | 103 $\pm$ 22                              | 87 $\pm$ 18                                             | 103 $\pm$ 12                               | 93 $\pm$ 21    |
|                                |                                                               | Std. Ad.      | 90 $\pm$ 19                               | 86 $\pm$ 20                                      | 108 $\pm$ 21                              | 103 $\pm$ 29                                            | 98 $\pm$ 24                                | 97 $\pm$ 23    |
| SRM 2976 Mussel Tissue         | 0.110 $\pm$ 0.013 <sup>f</sup>                                | Ext.          | 92 $\pm$ 36                               | 87 $\pm$ 35                                      | 100 $\pm$ 27                              | 96 $\pm$ 28                                             | 99 $\pm$ 28                                | 95 $\pm$ 31    |
|                                |                                                               | Std. Ad.      | 89 $\pm$ 23                               | 102 $\pm$ 28                                     | 95 $\pm$ 18                               | 93 $\pm$ 14                                             | 94 $\pm$ 12                                | 95 $\pm$ 20    |
| IAEA-359 Cabbage               | 0.091 $\pm$ 0.016 <sup>e</sup>                                | Ext.          | 101 $\pm$ 22                              | 96 $\pm$ 21                                      | <b>89 <math>\pm</math> 35<sup>i</sup></b> | 97 $\pm$ 19                                             | <b>119 <math>\pm</math> 26<sup>i</sup></b> | 103 $\pm$ 22   |
|                                |                                                               | Std. Ad.      | 93 $\pm$ 31                               | 112 $\pm$ 27                                     | 93 $\pm$ 31                               | 101 $\pm$ 27                                            | 116 $\pm$ 26                               | 103 $\pm$ 28   |
|                                | 0.074 $\pm$ 0.033 <sup>e</sup>                                | Ext.          | 124 $\pm$ 22                              | 118 $\pm$ 21                                     | 109 $\pm$ 20                              | 119 $\pm$ 19                                            | <b>146 <math>\pm</math> 26<sup>j</sup></b> | 123 $\pm$ 22   |
|                                |                                                               | Std. Ad.      | 115 $\pm$ 31                              | <b>138 <math>\pm</math> 27<sup>j</sup></b>       | 115 $\pm$ 31                              | 124 $\pm$ 27                                            | <b>143 <math>\pm</math> 26<sup>j</sup></b> | 127 $\pm$ 28   |
| Tort-2 Lobster Hepatopancreas  | 0.71 $\pm$ 0.04 <sup>f</sup>                                  | Ext.          | <b>71 <math>\pm</math> 18<sup>j</sup></b> | <b>70 <math>\pm</math> 23<sup>j</sup></b>        | 92 $\pm$ 21                               | 87 $\pm$ 20                                             | 87 $\pm$ 22                                | 89 $\pm$ 21    |
|                                |                                                               | Std. Ad.      | <b>69 <math>\pm</math> 24<sup>j</sup></b> | <b>72 <math>\pm</math> 18<sup>j</sup></b>        | 87 $\pm$ 19                               | <b>74 <math>\pm</math> 31<sup>j</sup></b>               | 86 $\pm$ 21                                | 87 $\pm$ 20    |
|                                | 0.582 $\pm$ 0.081 <sup>g</sup>                                | Ext.          | 87 $\pm$ 18                               | 86 $\pm$ 23                                      | 113 $\pm$ 21                              | 106 $\pm$ 20                                            | 107 $\pm$ 22                               | 100 $\pm$ 21   |
|                                |                                                               | Std. Ad.      | 85 $\pm$ 24                               | 88 $\pm$ 18                                      | 106 $\pm$ 19                              | 90 $\pm$ 31                                             | 105 $\pm$ 21                               | 95 $\pm$ 23    |
| 0.615 $\pm$ 0.086 <sup>g</sup> | Ext.                                                          | 82 $\pm$ 18   | 81 $\pm$ 23                               | 107 $\pm$ 21                                     | 100 $\pm$ 20                              | 101 $\pm$ 22                                            | 94 $\pm$ 21                                |                |
|                                | Std. Ad.                                                      | 80 $\pm$ 24   | 83 $\pm$ 18                               | 100 $\pm$ 19                                     | 85 $\pm$ 31                               | 99 $\pm$ 21                                             | 89 $\pm$ 23                                |                |
|                                | 0.544 $\pm$ 0.162 <sup>h</sup>                                | Ext.          | 93 $\pm$ 18                               | 92 $\pm$ 23                                      | 120 $\pm$ 21                              | 113 $\pm$ 20                                            | 114 $\pm$ 22                               | 106 $\pm$ 21   |
|                                |                                                               | Std. Ad.      | 91 $\pm$ 24                               | 94 $\pm$ 18                                      | 113 $\pm$ 19                              | 97 $\pm$ 31                                             | 112 $\pm$ 21                               | 101 $\pm$ 23   |
| Pooled recovery (%)            | Ext.                                                          | 92 $\pm$ 22   | 90 $\pm$ 26                               | 107 $\pm$ 19                                     | 102 $\pm$ 21                              | 107 $\pm$ 24                                            | 100 $\pm$ 23                               |                |
|                                | Std. Ad.                                                      | 92 $\pm$ 22   | 94 $\pm$ 24                               | 105 $\pm$ 22                                     | 97 $\pm$ 28                               | 104 $\pm$ 25                                            | 98 $\pm$ 24                                |                |

<sup>a</sup>U is the expanded uncertainty (k = 2, 95% confidence level); <sup>b</sup>U<sub>lab</sub> is the expanded uncertainty in laboratory (k = 2, n = 5 parallel measurements and 95% confidence level); <sup>c</sup>IMEP-41 procedure, prereduction with HBr and hydrazine sulfate, separation of iAs in toluene-1 mol L<sup>-1</sup> HCl system, derivatization to arsine with NaBH<sub>4</sub> in 1 mol L<sup>-1</sup> HCl<sup>25,53</sup>; <sup>d</sup>prereduction with L-cysteine and derivatization to arsine with NaBH<sub>4</sub> in 0.01 mol L<sup>-1</sup> HCl and 0.2% L-cysteine; <sup>e</sup>reference values from<sup>4,25,53</sup>; <sup>f</sup>reference values from<sup>59</sup>; <sup>g</sup>reference values calculated as mean according to the results centralized by Petursdottir *et al.*<sup>3,13,33</sup>; <sup>h</sup>reference values from<sup>52</sup>; <sup>i</sup>significant differences (p < 0.05) using Tukey's method; <sup>j</sup>significant differences (p < 0.05) using Dunnett's method

## 8. Weight of iAs fractions in foodstuffs

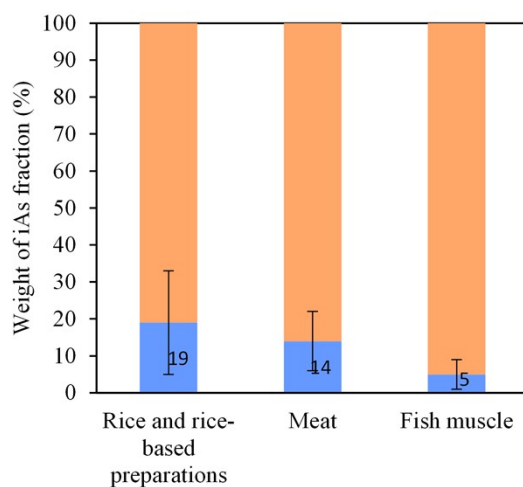

**Fig. S9.** Weight of iAs fraction (blue column) from total in foodstuffs

### Author contributions

**Lucia Chirita:** Investigation, Methodology, Resources, Funding acquisition, Data curation, Formal analysis, Writing – original draft. **Eniko Covaci:** Formal analysis, Visualization, Data curation, Software, Writing – original draft. **Michaela Ponta:** Validation, Writing – original draft. **Tiberiu Frentiu:** Conceptualization, Supervision, Funding acquisition, Project administration, Writing – review & editing.

### Conflicts of interest

There are no conflicts to declare.

### Acknowledgements

This work was supported by a grant of Ministry of Research and Innovation, Romania, project CNFIS-FDI-2022-0179, within PNCDI III and project financed by the European Commission, number POCU/380/6/13/123886.
